# Supplementary material
Source: Springer Nature journal article supplement (https://www.springermedizin.de/resource/supplementary/13054_2013_2191_MOESM5_ESM.pdf/9712638)

Supplemental Fig. 3

A

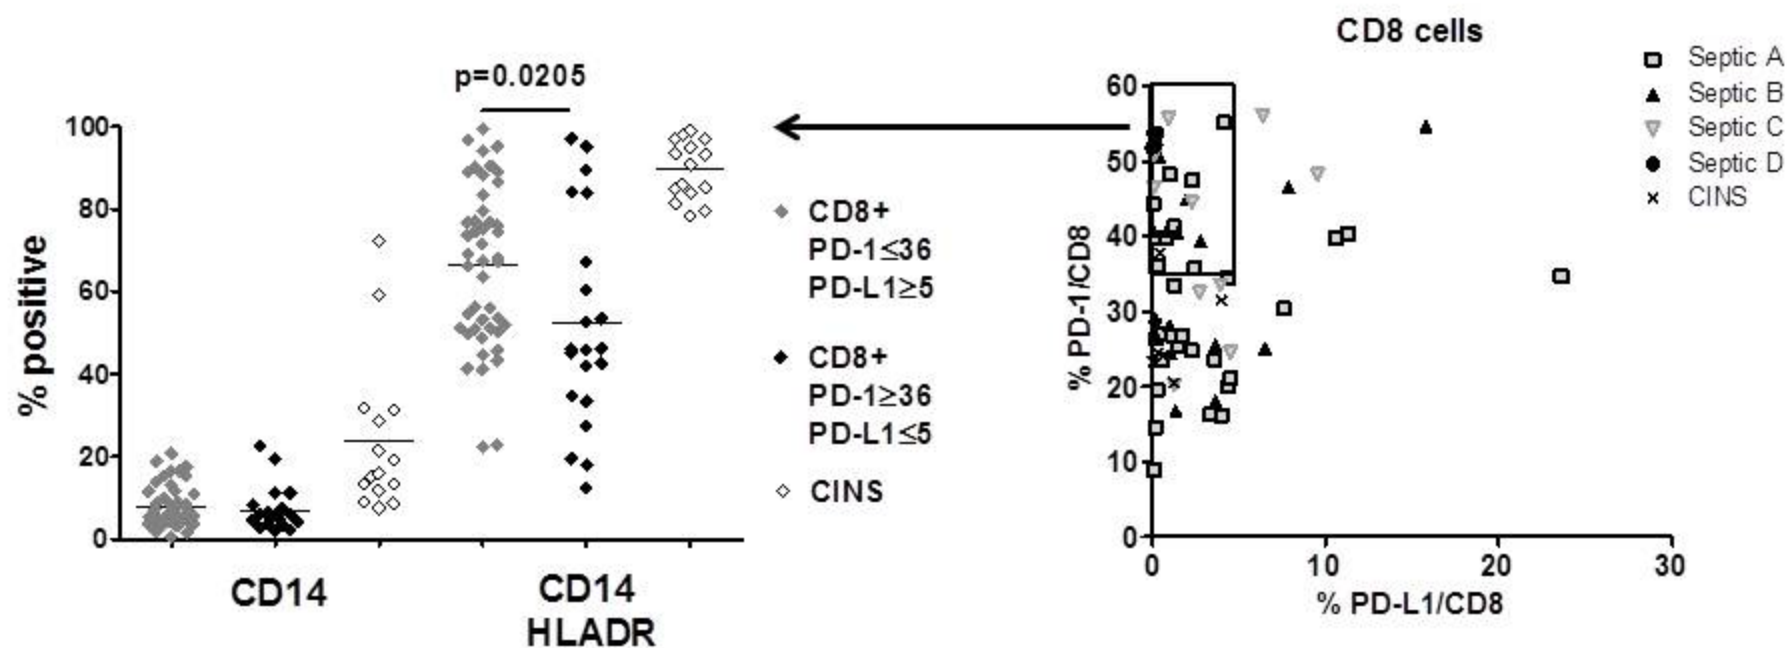

B

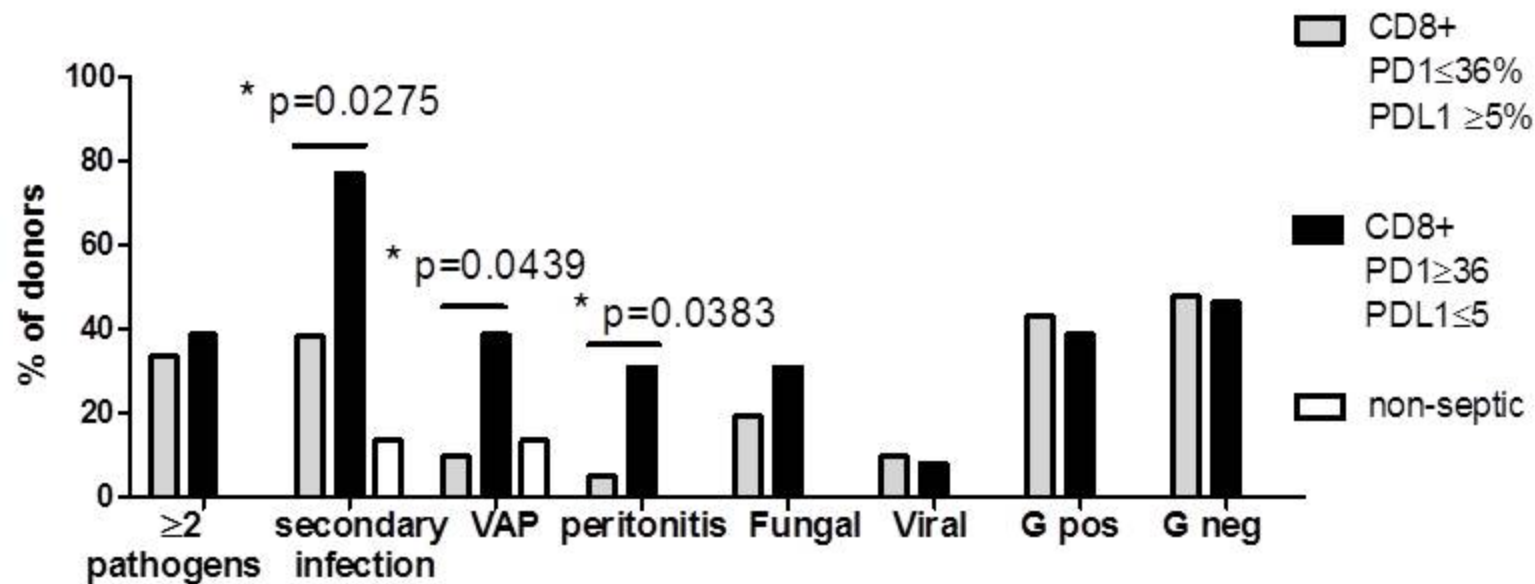

Supplement: MOESM5 [file 9712638]
